# Supplementary material for: A reversible molecule-gated system using mesoporous silica nanoparticles functionalized with K+-stabilized G-rich quadruplex DNA
Source: Royal Society of Chemistry journal article supplement (doi:10.1039/c5ra15016g), 2015-01-01
Supplement: c5ra15016g1.pdf [file c5ra15016g1.pdf]

## Supporting Information

### **A reversible molecule-gated system using mesoporous silica nanoparticles functionalized with $K^+$ -stabilized G-rich quadruplex DNA**

Xue Yang,<sup>†</sup> Dinggeng He,<sup>†</sup> Jie Cao, Xiaoxiao He\*, Kemin Wang\* and Zhen Zou

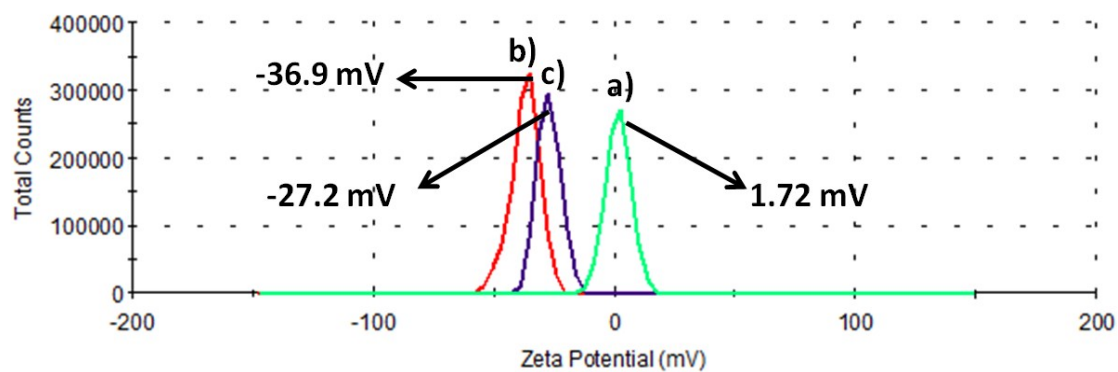

**Fig. S1** Zeta potential of MSN a), MSN-N<sub>3</sub> b) and MSN-GQDNA c)

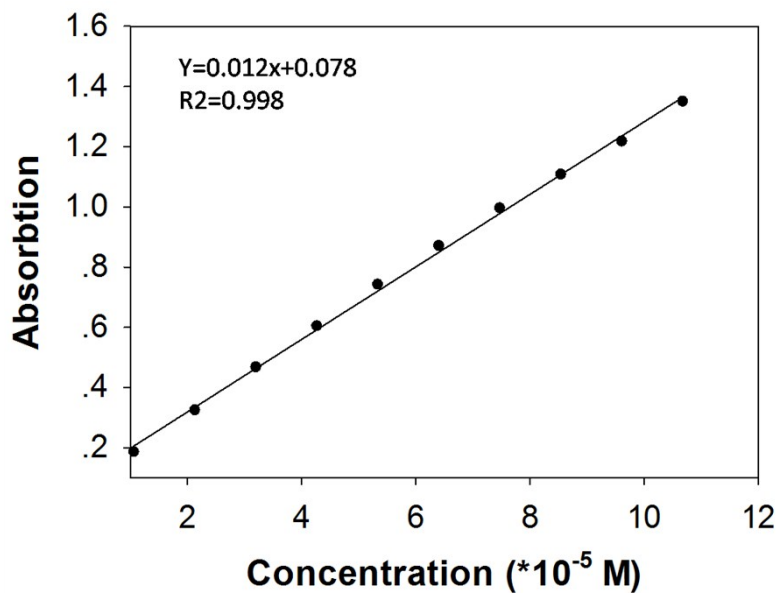

**Fig. S2** Standard curve of Ru(bipy)<sub>3</sub><sup>2+</sup>

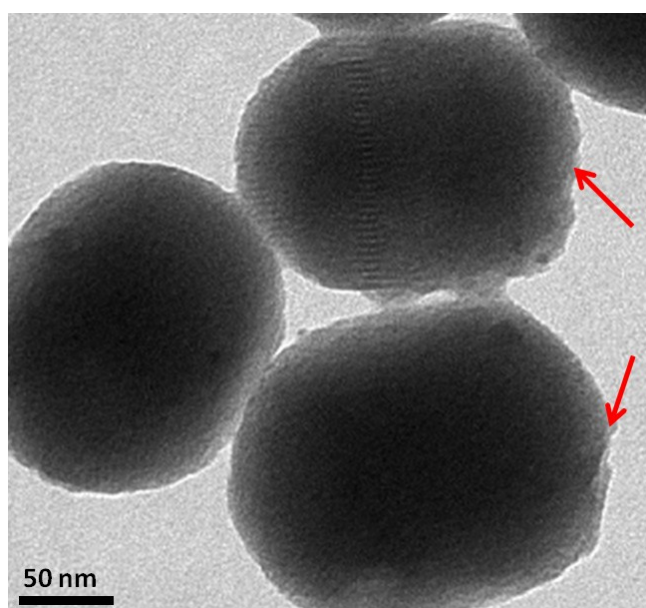

**Fig. S3** TEM image of MSN-GDDNA

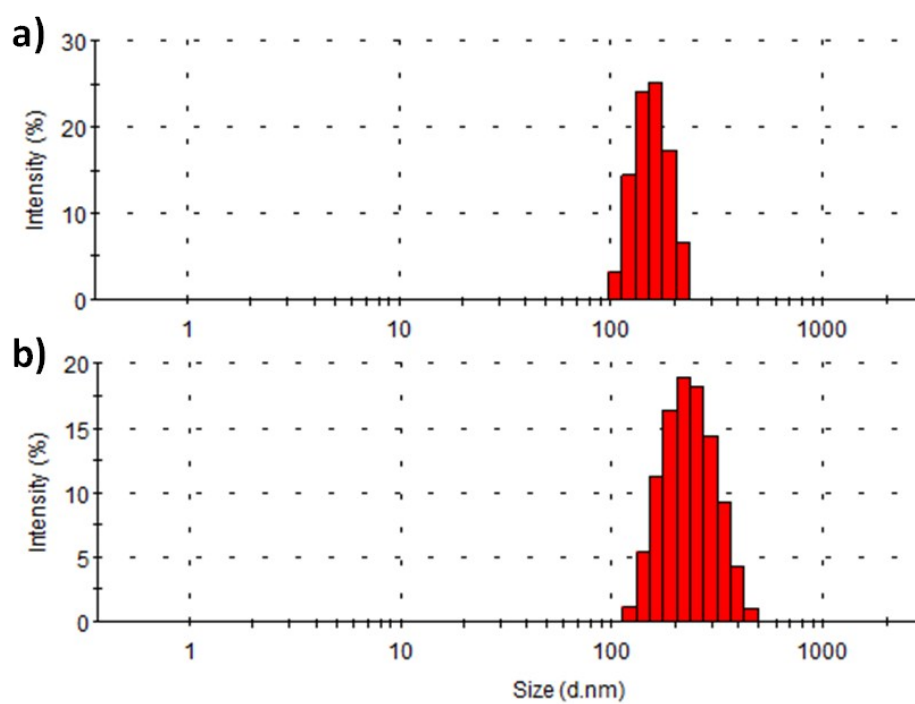

**Fig. S4** Size distribution of MSN-N<sub>3</sub> a) and MSN-GDDNA b)

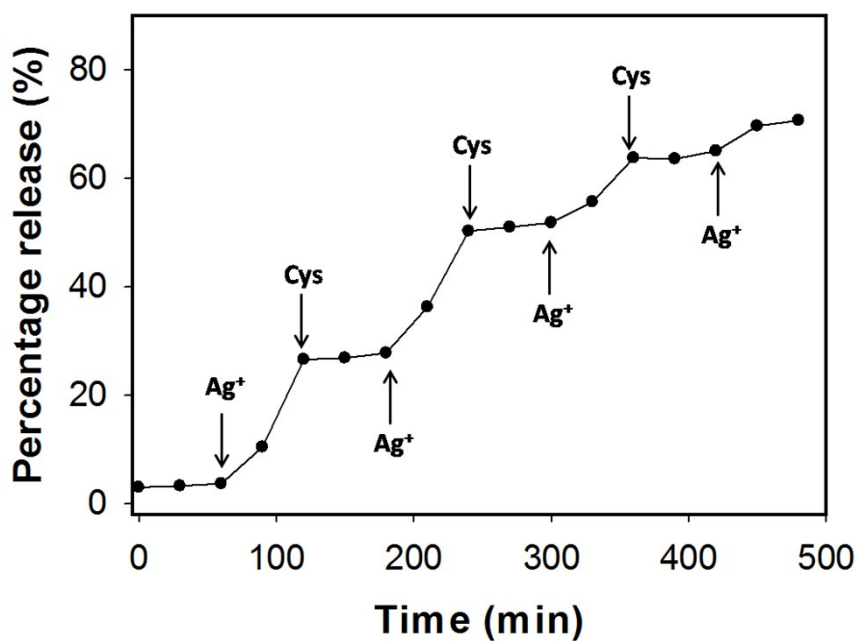

**Fig. S5** Partial molecular release profile of  $\text{Ru}(\text{bipy})_3^{2+}$  from MSN-Ru-GQDNA as a function of  $\text{Ag}^+$  and Cys alternative addition

**Table S1.** BET and BJH parameters

|                    | BET surface area<br>SBET ( $\text{m}^2 \text{g}^{-1}$ ) | BET pore volume<br>VP ( $\text{cm}^3 \text{g}^{-1}$ ) | BJH pore diameter<br>Dp (nm) |
|--------------------|---------------------------------------------------------|-------------------------------------------------------|------------------------------|
| MSN-N <sub>3</sub> | 851.2                                                   | 0.782                                                 | 2.2                          |
